# Supplementary material for: Clinical outcomes of switching to aflibercept using a pro re nata treatment regimen in patients with neovascular age-related macular degeneration who incompletely responded to ranibizumab
Source: Springer Nature journal article supplement (doi:10.1186/s12886-018-0688-3), 2018-01-30
Supplement: MOESM1 [file 15422264]

## Additional File 1 (Supplementary data)

Each stage (stages 1 to 4) was modelled for predictors of change in BCVA or CRT in each stage.

### 1. BCVA

a) Stage 1: Dependent BCVA at end of stage has one predictor

|               | Training | Cross-Validation | Std Error                  |
|---------------|----------|------------------|----------------------------|
| R squared     | 0.18     | 0.15             | 0.01                       |
| AUC           | 0.74     | 0.74             | 0.01                       |
| Accuracy      | 0.69     | 0.68             | 0.01                       |
|               |          | Std Coefficient  | Out of sample Freq (n=200) |
| Predictors    |          |                  |                            |
| BCVA baseline |          | 2.14             | 200                        |

b) Stage 2 – Dependent BCVA at end of stage has one predictor

|                          | Training | Cross validation | Std error                  |
|--------------------------|----------|------------------|----------------------------|
| Rsquared                 | 0.05     | 0.02             | 0.01                       |
| AUC                      | 65       | 61               | 0.01                       |
| Accuracy                 | 76       | 75               | 0.01                       |
|                          |          | Std Coeff        | Out of sample Freq (n=200) |
| Predictors               |          |                  |                            |
| BCVA at start of stage 2 |          | 0.77             | 200                        |

c) Stage 3 - Dependent BCVA at end of stage has 3 predictors. These are days to switch and 1<sup>st</sup> injection to switch, and BCVA at start of stage

|          | Training | Cross validation | St error |
|----------|----------|------------------|----------|
| Rsquared | 0.07     | 0.02             | 0.01     |
| AUC      | 0.65     | 0.57             | 0.01     |
| Accuracy | 0.62     | 0.59             | 0.01     |

|                                                  |                             | Std Coeff | Out of sample Freq (n=200) |
|--------------------------------------------------|-----------------------------|-----------|----------------------------|
| Predictors                                       | Pratt Importance In Model % |           |                            |
| Days from RBZ loading to switch                  | 58                          | - 3.4     | 200                        |
| Days from 1 <sup>st</sup> presentation to switch | 29                          | 1.9       | 192                        |
| BCVA at start of stage 3                         | 13                          | 0.76      | 189                        |

d) Stage 4 - Dependent BCVA at end of stage has two predictors: CRT after AFL loading, CRT at switch

|                      | Training                    | Cross validation | St error                   |
|----------------------|-----------------------------|------------------|----------------------------|
| Rsquared             | 0.07                        | 0.02             | 0.01                       |
| AUC                  | 0.67                        | 0.60             | 0.01                       |
| Accuracy             | 0.78                        | 0.76             | 0.01                       |
|                      |                             | Std Coeff        | Out of sample Freq (n=200) |
| Predictors           | Pratt Importance in model % |                  |                            |
| CRT post AFL loading | 57                          | 0.46             | 200                        |
| CRT switch           | 43                          | 0.43             | 199                        |

## 2. CRT

a) Stage 1: Dependent CRT at end of stage had one predictor: initial CRT

|              | Training | Cross-Validation | Std Error                     |
|--------------|----------|------------------|-------------------------------|
| R squared    | 0.15     | 0.03             | 0.04                          |
| AUC          | 0.83     | 0.77             | 0.02                          |
| Accuracy     | 0.81     | 0.80             | 0.01                          |
|              |          | Std Coefficient  | Out of sample Freq<br>(n=200) |
| Predictors   |          |                  |                               |
| CRT baseline |          | 4.6              | 198                           |

b) Stage 2: Dependent CRT change had one predictor: initial CRT at start of stage 2

|                         | Training | Cross-validation | Std error                     |
|-------------------------|----------|------------------|-------------------------------|
| Rsquared                | 0.14     | 0.1              | 0.01                          |
| AUC                     | 0.74     | 0.71             | 0.01                          |
| Accuracy                | 0.69     | 0.68             | 0.02                          |
|                         |          | Std Coefficient  | Out of sample freq<br>(n=200) |
| Predictors              |          |                  |                               |
| CRT post RBZ<br>loading |          | 1.64             | 200                           |

c) Stage 3: Dependent CRT at end of stage has one predictor: CRT at switch

|               | Training | Cross validation | Std error                    |
|---------------|----------|------------------|------------------------------|
| Rsquared      | 0.16     | 0.1              | 0.04                         |
| AUC           | 0.82     | 0.76             | 0.02                         |
| Accuracy      | 0.87     | 0.84             | 0.01                         |
|               |          | Std Coefficient  | Out of sample<br>Freq(n=200) |
| Predictors    |          |                  |                              |
| CRT at switch |          | 4.9              | 196                          |

d) Stage 4: Dependent CRT at end of stage had four predictors: initial CRT and BCVA at beginning of stage and BCVA and CRT post RBZ loading

|                          | Training                       | Cross validation | Std Error                     |
|--------------------------|--------------------------------|------------------|-------------------------------|
| Rsquared                 | 0.13                           | 0.03             | 0.02                          |
| AUC                      | 0.69                           | 0.56             | 0.02                          |
| Accuracy                 | 0.65                           | 0.63             | 0.01                          |
|                          |                                | Std Coefficient  | Out of sample<br>freq (n=200) |
|                          |                                |                  |                               |
| Predictors               | Pratt importance in<br>model % |                  |                               |
| CRT post AFL<br>loading  | 59                             | 1.53             | 199                           |
| BCVA post AFL<br>loading | 25                             | 1.22             | 197                           |
| CRT post RBZ<br>loading  | 8                              | - 0.78           | 182                           |
| BCVA post RBZ<br>loading | 9                              | - 0.89           | 173                           |

Note in the above that a 7 predictor optimum at AUC=0.58 (se=0.02) reduces to 4 predictor on standard error rule where AUC=0.560 and contribution to model
