# Supplementary material for: Clinical outcomes of switching to aflibercept using a pro re nata treatment regimen in patients with neovascular age-related macular degeneration who incompletely responded to ranibizumab
Source: Springer Nature journal article supplement (doi:10.1186/s12886-018-0688-3), 2018-01-30
Supplement: MOESM2 [file 15422264]

## Additional File 2 (Supplementary Data)

Summary statistics for CRT and BCVA change in patients following RBZ PRN

### CRT

| Description                                            | Change in CRT ( $\mu\text{m}$ ) | No. of eyes |
|--------------------------------------------------------|---------------------------------|-------------|
| Decrease (i.e. improvement) in CRT following RBZ PRN   | 1 – 50                          | 44          |
|                                                        | 51– 100                         | 16          |
|                                                        | >100                            | 5           |
| No change                                              | 0                               | 11          |
| Increase (i.e. deterioration) in CRT following RBZ PRN | 1 – 50                          | 38          |
|                                                        | 51– 100                         | 28          |
|                                                        | >100                            | 31          |
| Total of those with complete CRT data                  |                                 | 173         |
| Missing CRT readings (either pre- or post RBZ PRN)     |                                 | 35          |
| <b>Total</b>                                           |                                 | <b>208</b>  |

Spearman rank-order correlation coefficient revealed no significant correlation between these different groups with CRT ( $p=0.268$ ,  $r= -0.085$ ) or BCVA ( $p=0.373$ ,  $r= -0.068$ ) during AFL PRN.

### BCVA

| Description                                                 | Change in letters | No. of eyes |
|-------------------------------------------------------------|-------------------|-------------|
| Letters gained (i.e. improvement in BCVA) following RBZ PRN | 1 – 5 (1)         | 31          |
|                                                             | 6 – 10 (2)        | 14          |
|                                                             | 11 – 15 (3)       | 8           |
|                                                             | >15 (4)           | 2           |
| No change                                                   | 0 (5)             | 21          |
| Letters lost (i.e. deterioration in BCVA) following RBZ PRN | 1 – 5 (6)         | 43          |
|                                                             | 6 – 10 (7)        | 28          |
|                                                             | 11 – 15 (8)       | 23          |
|                                                             | >15               | 38          |
| Total of those with complete BCVA data (no missing data)    |                   | <b>208</b>  |

Similarly, Spearman rank-order correlation coefficient revealed no significant correlation between these different groups with CRT ( $p=0.935$ ,  $r= 0.006$ ) and or BCVA ( $p=0.072$ ,  $r=0.126$ ) during AFL PRN.
